# Supplementary material for: Development and validation of DSM-5 based diagnostic tool for children with Autism Spectrum Disorder
Source: PubMed Central journal article supplement (PMC6415840; doi:10.1371/journal.pone.0213242), 2019-03-13
Supplement: pone.0213242.s001.pdf [file pone.0213242.s001.pdf]

**AIIMS Modified INDT-ASD Diagnostic Tool for  
Autism Spectrum Disorder**

Name of the Child: \_\_\_\_\_

Date of Birth: DD/MM/YYYY

Age: \_\_ years \_\_ months

**Sex:**

**Complete Address:**

**Phone number:**

**Date of Assessment: DD/MM/YYYY**

**Name of the Assessor:**

## INSTRUCTIONS FOR EVALUATION

**Primary caregiver** must be present with the child

- These behaviors are to be assessed in the context of children of **same age**
- Explain to parents that the answers should be based on the child's **behavior most of the time**
- Follow the age directions given along with the question. For questions where no age cut-off is given, they should be asked for all children i.e. all ages (1-14 years)
- Ask the questions **verbatim**

Question can be **repeated** if the respondent can not understand

Still, if the respondent cannot understand, give **example** for the particular behavior;

**No further elaboration** is allowed

- The questionnaire should be **supplemented by observations** for the suggestive behavior in the child **throughout** the assessment.
- Observe the behavior of child during the entire interview to confirm the presence or absence of a particular behavior (First ask, then observe if observation is discrepant, then re ask the question and re-check the observation)
- When there is discrepancy between parental response and your observation, \* indicates whether parent report or observation should take precedence, and marked accordingly
  
- When the parent's response is "unsure" your observation of the particular behavior will be given weightage even asterisk (\*) is on parental response. In case you are also unable to observe the behavior, and then only mark the response as "Unsure".
- Some criteria have multiple questions. **While scoring**, consider the criteria fulfilled even if response to **any one** of the questions is abnormal. For example, the criterion A1a is considered fulfilled if any one of i, ii, iii, or iv is abnormal in the child

## AIIMS Modified INDT-ASD Diagnostic Evaluation for ASD

| Section                                       | Ask                                                                                                                                                                                                                                                                                                                                                                                                                            | Observe                                                                                                 | Yes                   | No                    | Unsure |
|-----------------------------------------------|--------------------------------------------------------------------------------------------------------------------------------------------------------------------------------------------------------------------------------------------------------------------------------------------------------------------------------------------------------------------------------------------------------------------------------|---------------------------------------------------------------------------------------------------------|-----------------------|-----------------------|--------|
| A1a<br><br>Social<br>emotional<br>reciprocity | i) * <b><i>For children aged less than 4 years:</i></b> Does/did your child <b>ever</b> point with his/her index finger to bring your attention to show the things that interest him/her? <i>E.g. kite, plane flying in the sky, cow/dog on the road etc.</i> <b><i>For children aged 4 years or more:</i></b> Does your child <b>usually</b> bring things to show you on his/her own he/she has made painted or new toy/gift? | Observe how the child draws attention toward a toy/object of interest;<br>Look for coordinated pointing |                       | <input type="radio"/> |        |
|                                               | ii) * <b><i>For children aged 4 years or more, and are able to speak:</i></b> Does your child talk to you about things he/she likes or has achieved without being asked about them?                                                                                                                                                                                                                                            |                                                                                                         |                       | <input type="radio"/> |        |
|                                               | iii) * Does your child <b>usually</b> prefer to play alone <b>and</b> gets irritated/moves away when his/her sibs or other kids try to play with him/her?                                                                                                                                                                                                                                                                      | Quality of play activity in a group of children or with siblings                                        | <input type="radio"/> |                       |        |

|  |                                                                                                                                                                                                                         |                                                                                    |  |                       |  |
|--|-------------------------------------------------------------------------------------------------------------------------------------------------------------------------------------------------------------------------|------------------------------------------------------------------------------------|--|-----------------------|--|
|  | iv) * Does your child play <b>games involving turn taking or rule based</b> with other children <b>properly?</b> <i>E.g. Cricket, Hide and seek/I-spy, Ludo,Stapoo, Ring-a- ring roses etc.</i>                         | Quality of child's involvement in rule-based games or games involving taking turns |  | <input type="radio"/> |  |
|  | v) * Does your child <b>usually</b> share his/her happiness with you or come to you for comfort when hurt or upset?                                                                                                     | Sharing happiness or distress with the parents                                     |  | <input type="radio"/> |  |
|  | vi) * <b>For children aged 4 years or more:</b><br>Does your child <b>usually</b> share your happiness or try to comfort you when you are upset / sad?                                                                  | Sharing of parent's happiness or distress by the child                             |  | <input type="radio"/> |  |
|  | vii)* Does your child <b>initiate</b> a conversation with you?                                                                                                                                                          | Quality of child's conversation with parents or yourself                           |  | <input type="radio"/> |  |
|  | viii)* <b>For children aged 4 years or more:</b> Can you have conversation with your child during which he/she not only answers your questions, but also <b>adds</b> something new to <b>continue</b> the conversation? | Quality of child's conversation with parents or yourself                           |  | <input type="radio"/> |  |

|                                                    |                                                                                                                                                                                                                                                                                     |                                                                                                                                                                 |  |                       |  |
|----------------------------------------------------|-------------------------------------------------------------------------------------------------------------------------------------------------------------------------------------------------------------------------------------------------------------------------------------|-----------------------------------------------------------------------------------------------------------------------------------------------------------------|--|-----------------------|--|
| <p>Section A1b</p> <p>Non verbal communication</p> | <p>i) * <b><i>For children aged less than 4 years:</i></b></p> <p>Does your child <b>usually</b> enjoy being taken in the lap or hugged?<b><i>For children aged 4 years or more:</i></b> When your child was a baby/toddler, did he/she enjoy being taken in the lap or hugged?</p> | <p>In children below 4 years age: Response to being touched and cuddled by parent: enjoys/tolerates/squirms/ stiffens/ gets upset/ Indifferent</p>              |  | <input type="radio"/> |  |
|                                                    | <p>ii) Does your child <b>usually</b> make eye contact with you or other people?</p> <p><i>E.g. While playing, asking for things, talking to you.</i></p>                                                                                                                           | <p>* Quality of eye contact</p>                                                                                                                                 |  | <input type="radio"/> |  |
|                                                    | <p>iii) * Does your child <b>usually</b> use various gestures appropriately during social interactions?</p> <p><i>E.g. Namaste, Salaam, <b>waving</b> bye-bye, hello, touching feet etc. (At least sometimes spontaneously) (use appropriate example as required)</i></p>           | <p>Use of these gestures in response to your greeting and while departing</p>                                                                                   |  | <input type="radio"/> |  |
|                                                    | <p>iv) Does your child <b>usually</b> show appropriate facial expressions according to the situation?</p> <p><i>E.g. being happy, sad, afraid etc.</i></p>                                                                                                                          | <p>*Appropriateness of facial expressions while interacting with parents, with you (stranger), while playing, when given toy/favorite food or when scolded.</p> |  | <input type="radio"/> |  |

|                                               |                                                                                                                                                                                                                                                                                                                |                                                                   |                       |                       |  |
|-----------------------------------------------|----------------------------------------------------------------------------------------------------------------------------------------------------------------------------------------------------------------------------------------------------------------------------------------------------------------|-------------------------------------------------------------------|-----------------------|-----------------------|--|
| Section A1c<br>Relationships                  | i) * Does your child <b>usually</b> enjoy the company of other children?                                                                                                                                                                                                                                       | Child's interaction with other children                           |                       | <input type="radio"/> |  |
|                                               | ii) * <b>For children aged 4 years or more:</b> Does your child have friends of his/her age (In school and neighbor-hood) with whom he/she loves to chat, share food or play together?                                                                                                                         | Quality of child's interaction with other children of his/her age |                       | <input type="radio"/> |  |
|                                               | iii) * <b>For children aged 4 years or more:</b><br>Does your child play <b>mostly</b> with children who are much older or much younger than him/her?                                                                                                                                                          | Quality of child's interaction with other children                | <input type="radio"/> |                       |  |
| Section A2a<br>Stereotyped movement or speech | i) Does your child <b>usually</b> repeat words or phrases regardless of meaning (in part or whole) that he/she has heard?<br><br><i>E.g. If you say 'toffee' he will also say 'toffee' if you say 'come' he will also say 'come' and if you ask "what is your name", he/she also says "what is your name".</i> | * Immediate echolalia (words or phrases)                          | <input type="radio"/> |                       |  |
|                                               | ii) Does he/she <b>incessantly</b> repeat things/T.V serial dialogue regardless of meaning/ context, whatever he/she has heard <b>later on</b> ?                                                                                                                                                               | * Delayed echolalia                                               | <input type="radio"/> |                       |  |

|  |                                                                                                                                                                                                                                                                                                                    |                                                                          |                       |  |  |
|--|--------------------------------------------------------------------------------------------------------------------------------------------------------------------------------------------------------------------------------------------------------------------------------------------------------------------|--------------------------------------------------------------------------|-----------------------|--|--|
|  | <p>iii) <b><i>For children aged 4 years or more:</i></b> Does your child <b>usually</b> use “I for me” and “me for you” incorrectly?<br/><i>E.g., when you ask “do you want milk?” he/she says “yes, you want milk” or “Rohit wants milk” (referring to him self).</i></p>                                         | * Pronoun reversal                                                       | <input type="radio"/> |  |  |
|  | <p>iv) <b><i>For children aged 4 years or more:</i></b> During conversation does your child <b>often</b> speak ‘out of context’ or irrelevantly?</p>                                                                                                                                                               | Out-of-context speech and neologisms                                     | <input type="radio"/> |  |  |
|  | <p>v) * <b><i>For children aged 6 years or more:</i></b><br/>Does your child understand that somebody is making fun of him/her or can he/she understand jokes?</p>                                                                                                                                                 | Child’s response to an age-appropriate joke                              | <input type="radio"/> |  |  |
|  | <p>vi) Does your child keep on <b>repeating</b> any of the followings, like</p> <ul style="list-style-type: none"> <li>• flapping hands,</li> <li>• hand wringing,</li> <li>• toe-walking,</li> <li>• rocking or spinning,</li> <li>• making <b>unusual</b> finger or hand movements near his/her face?</li> </ul> | * Any type of motor stereotypes, unusual finger/hand movements near face | <input type="radio"/> |  |  |
|  | <p>vii) * Does your child have <b>inappropriate</b> fascination with movement?</p>                                                                                                                                                                                                                                 | Child’s <b>inappropriate</b> fascination with objects in motion          | <input type="radio"/> |  |  |

|                               |                                                                                                                                                                                                                                                                                                                                                                                                                                                                             |                                                           |                       |  |  |
|-------------------------------|-----------------------------------------------------------------------------------------------------------------------------------------------------------------------------------------------------------------------------------------------------------------------------------------------------------------------------------------------------------------------------------------------------------------------------------------------------------------------------|-----------------------------------------------------------|-----------------------|--|--|
|                               | <i>E.g. spinning wheels, opening and closing of doors, electric fan, running water and any other revolving object etc.</i>                                                                                                                                                                                                                                                                                                                                                  |                                                           |                       |  |  |
| Section A2b<br>Routines       | <p>Does your child unreasonably <b>insist</b> on doing things in a particular way and/or become <b>upset</b> if there is any change in the daily routine?</p> <p><i>E.g., Taking exactly the same route to the school or market, insisting on food being served in the same pattern or sequence etc.</i></p>                                                                                                                                                                | Child's insistence on any unusual routines or rituals     | <input type="radio"/> |  |  |
| Section A2c<br>Fixed interest | <p>Does your child prefer to play with a particular <b>part</b> of a toy/object rather than the whole toy/object?</p> <p><i>E.g. wheels of a toy rather than the whole toy</i></p> <p>And/ Or</p> <p>Persistent unusual preoccupation with inanimate objects? E.g. Toffee wrappers, threads, bits of papers, flowing water</p> <p>And/ Or</p> <p>Persistent behavioural attributes? E.g. Liking particular sound/ visual stimuli, any particular color or form of cloth</p> | * Quality of child's play with different toys and objects | <input type="radio"/> |  |  |



|                                        |                                                                       |                                                                              |                       |  |  |
|----------------------------------------|-----------------------------------------------------------------------|------------------------------------------------------------------------------|-----------------------|--|--|
| Section A2d<br><br>Sensory<br>symptoms | i) Is your child indifferent to pain or temperature?                  | Apparent indifference to pain or temperature                                 | <input type="radio"/> |  |  |
|                                        | ii) Does your child show excess reaction to specific sound or texture | Getting irritated with certain specific sounds or texture of certain clothes | <input type="radio"/> |  |  |
|                                        | iii) Does your child have excessive smelling?                         | Excessive smelling of hands or arms                                          | <input type="radio"/> |  |  |
|                                        | iv) Does your child have excessive touching of objects?               | Excessive touching objects in the room                                       | <input type="radio"/> |  |  |

**SECTION B Complete this section (1-4) based on responses from section A**

|                                                                                                                                                                         |                                  |                           |
|-------------------------------------------------------------------------------------------------------------------------------------------------------------------------|----------------------------------|---------------------------|
| <p><b>1. No. of criteria fulfilled in A1 of the section A (Social Interaction and communication)</b></p> <p>0: Two or less <input type="checkbox"/></p> <p>1: Three</p> |                                  |                           |
| <p><b>2. No. of criteria fulfilled in A2 of the section A (restrictive and repetitive)</b></p> <p>0: Nil or one <input type="checkbox"/></p> <p>1: Two or more</p>      |                                  |                           |
| <p><b>3. Is there onset at early development?</b></p> <p>0: No <input type="checkbox"/></p> <p>1: Yes</p>                                                               |                                  |                           |
| <p><b>4. Is there an impaired functioning?</b></p> <p>0: No <input type="checkbox"/></p> <p>1: Yes</p>                                                                  |                                  |                           |
| <p><b>5. Interpretation of questionnaire (1 to 4)</b></p> <p>0: No ASD ( If response to any of 1-4 is “0”)</p> <p>1: ASD present (If response to 1-4 is “1” )</p>       |                                  |                           |
| <p><b>6. Total number of criteria fulfilled in A1 and A2 together</b></p> <p>0. Four or less <input type="checkbox"/></p> <p>1. Five or more</p>                        |                                  |                           |
| <p><b>7. Summary assessment of ASD</b></p> <p>0: No ASD (Response to 5 and 6 is “0”)</p> <p>1: ASD (Response to 5 and 6 is “1” and 8 is “0”)</p>                        |                                  |                           |
| <p><b>8. Can these symptoms be solely explained by Intellectual Disability?</b></p> <p>0: No 1: Yes <input type="checkbox"/></p>                                        |                                  |                           |
| <p><b>Additional Notes if any:</b></p>                                                                                                                                  |                                  |                           |
| <b>Name of the Assessor</b>                                                                                                                                             | <b>Signature of the Assessor</b> | <b>Date of assessment</b> |
